# Supplementary material
Source: Research Square preprint supplement (doi:10.21203/rs.3.rs-10186022/v1)
Supplement: Supplementary file 1 [file 2b1aefe9b1ca9f3dd8a1c04c.pdf]

**Table 3 – TCIM Literature Review Summary**

Summary of studies included studies, quality appraisal results, and thematic contributions. This table presents the studies included in the systematic review, their quality appraisal outcomes using the Newcastle–Ottawa Scale or the Critical Appraisal Skills Programme, and the key themes identified in each study.

| No. | Author/s         | Year | Title                                                                                                                                                                          | Country                     | Aim of study                                                                                                                                                                                                                                                                                                                                                                                                                                                                                                                                                                                                   | Type of study         | Population description | Sample | Technique | Study funding sources                                                                    | Conflicts of interest                                                                                                                                   | NOS Stars/6 | CASP | Perceptions and Attitudes | Behaviours | Facilitators | Barriers |
|-----|------------------|------|--------------------------------------------------------------------------------------------------------------------------------------------------------------------------------|-----------------------------|----------------------------------------------------------------------------------------------------------------------------------------------------------------------------------------------------------------------------------------------------------------------------------------------------------------------------------------------------------------------------------------------------------------------------------------------------------------------------------------------------------------------------------------------------------------------------------------------------------------|-----------------------|------------------------|--------|-----------|------------------------------------------------------------------------------------------|---------------------------------------------------------------------------------------------------------------------------------------------------------|-------------|------|---------------------------|------------|--------------|----------|
| 1   | Adams et al.     | 2022 | Practitioner and practice characteristics of Australian osteopaths who discuss lifestyle factors with patients: Findings from a national practice-based research network       | Australia                   | Examine the practitioner and practice characteristics, and clinical management of osteopaths who discuss common lifestyle topics with patients in Australia. These topics include diet/nutrition, smoking/drugs/alcohol, physical activity/fitness, and stress management.                                                                                                                                                                                                                                                                                                                                     | Cross sectional study | Osteopath              | 992    | Survey    | Osteopathy Australia                                                                     | None                                                                                                                                                    | 6           | N/A  |                           | X          | X            |          |
| 2   | Fernandez et al. | 2019 | The prevalence and determinants of physical activity promotion by Australian chiropractors: A cross-sectional study                                                            | Australia                   | Examine the prevalence and characteristics of Australian chiropractors who frequently discuss patient physical activity.                                                                                                                                                                                                                                                                                                                                                                                                                                                                                       | Cross sectional study | Chiropractor           | 2005   | Survey    | Australian Chiropractors Association (ACA)                                               | Not stated                                                                                                                                              | 6           | N/A  |                           | X          | X            | X        |
| 3   | Fikar et al.     | 2015 | Current preventative and health promotional care offered to patients by chiropractors in the United Kingdom: a survey                                                          | United Kingdom              | To determine if care is being provided by UK chiropractors in regard to preventative healthcare and health promotion, particularly in the areas of nutrition, physical fitness and exercise, psychosocial wellbeing, smoking and alcohol consumption. Also to identify to what extent such care is provided.                                                                                                                                                                                                                                                                                                   | Cross sectional study | Chiropractor           | 509    | Survey    | Not stated                                                                               | None                                                                                                                                                    | 5           | N/A  | X                         | X          | X            |          |
| 4   | Harnett et al.   | 2022 | Naturopathic practitioners' approach to caring for people with cardiovascular disease risk factors: A cross-cultural cross-sectional study reporting the providers perspective | United States and Australia | Conduct a cross-cultural survey to obtain information about how Naturopathic Practitioners in the United States and Australia approach the management of people living with CVD risk factors.                                                                                                                                                                                                                                                                                                                                                                                                                  | Cross sectional study | Naturopath             | 151    | Survey    | None                                                                                     | Not stated                                                                                                                                              | 4           | N/A  |                           | X          |              |          |
| 5   | Hawk & Dusio     | 1995 | A survey of 492 US Chiropractors on primary-care and prevention related issues                                                                                                 | United States               | Gain information on the issue of scope of chiropractic practice, particularly in relation to primary care and prevention.                                                                                                                                                                                                                                                                                                                                                                                                                                                                                      | Cross sectional study | Chiropractor           | 492    | Survey    | Not stated                                                                               | Not stated                                                                                                                                              | 6           | N/A  | X                         | X          |              |          |
| 6   | Hawk et al.      | 2004 | A survey of US chiropractors on clinical preventive services                                                                                                                   | United States               | Assess baseline attitudes of current chiropractic students, public health faculty, and field practitioners toward the topics of clinical preventive and health promotion services.                                                                                                                                                                                                                                                                                                                                                                                                                             | Cross sectional study | Chiropractor           | 496    | Survey    | Foundation for Chiropractic Education and Research                                       | Not stated                                                                                                                                              | 5           | N/A  | X                         | X          | X            |          |
| 7   | Hopton et al.    | 2012 | Acupuncture in practice: mapping the providers, the patients and the settings in a national cross-sectional survey                                                             | United Kingdom              | Investigate the current state of Acupuncture practice in the UK. Survey the major professional associations in order to characterise the practitioners, the conditions that are most commonly treated and some characteristics of the treatment process.                                                                                                                                                                                                                                                                                                                                                       | Cross sectional study | Acupuncturist          | 330    | Survey    | National Institute of Health Research Career Scientist Award, awarded to Hugh MacPherson | None                                                                                                                                                    | 5           | N/A  |                           | X          |              |          |
| 8   | Jamison          | 2002 | Health information and promotion in chiropractic clinics                                                                                                                       | Australia                   | Assess the willingness of chiropractors to encourage patient self-care through educational measures and to ascertain the health information interest shared by chiropractors and their patients. Explore health information topics and strategies chiropractors were willing to use to enable their patients to make informed everyday lifestyle choices. Identify health information initiatives intrinsic to the practice of maintenance care. Assess the willingness of chiropractors to advise patients on injury prevention and the extent to which chiropractors themselves avoided work-related injury. | Cross sectional study | Chiropractor           | 138    | Survey    | Australian Spinal Research Foundation                                                    | Not stated                                                                                                                                              | 3           | N/A  | X                         | X          |              |          |
| 9   | Lee et al.       | 2018 | The use of nutritional guidance within chiropractic patient management: a survey of 333 chiropractors from the ACORN practice-based research network                           | Australia                   | Measure the proportion of chiropractors who apply nutritional management; identifying methods used to assess nutritional status of patients; and identifying how chiropractors guide and educate their patients regarding nutrition.                                                                                                                                                                                                                                                                                                                                                                           | Cross sectional study | Chiropractor           | 333    | Survey    | None                                                                                     | Not stated                                                                                                                                              | 6           | N/A  |                           | X          |              |          |
| 10  | Mistry et al.    | 2018 | Attitudes and self-reported practices of New Zealand osteopaths to exercise consultation                                                                                       | New Zealand                 | Survey New Zealand (NZ) osteopaths to investigate attitudes towards exercise consultation in the context of both general health and specific medical conditions, determine the proportion of NZ osteopaths who practice exercise consultation for general health and specific medical conditions, and identify factors influencing these attitudes and practices.                                                                                                                                                                                                                                              | Cross sectional study | Osteopath              | 125    | Survey    | Not stated                                                                               | RM (author) is an Executive Editor of the journal but was not involved in decisions regarding this manuscript. No other conflicts of interest declared. | 5           | N/A  | X                         | X          | X            | X        |

|    |                            |      |                                                                                                                                   |                                                                                                                                                              |                                                                                                                                                                                                                                                                                                                                                                                                                                                                                                                                                                                        |                       |                                                |                                                                                                                                                                                                                              |                                                         |                                                                                                                                                                                                           |                                                                                                                                                                                                      |   |     |  |   |   |   |   |
|----|----------------------------|------|-----------------------------------------------------------------------------------------------------------------------------------|--------------------------------------------------------------------------------------------------------------------------------------------------------------|----------------------------------------------------------------------------------------------------------------------------------------------------------------------------------------------------------------------------------------------------------------------------------------------------------------------------------------------------------------------------------------------------------------------------------------------------------------------------------------------------------------------------------------------------------------------------------------|-----------------------|------------------------------------------------|------------------------------------------------------------------------------------------------------------------------------------------------------------------------------------------------------------------------------|---------------------------------------------------------|-----------------------------------------------------------------------------------------------------------------------------------------------------------------------------------------------------------|------------------------------------------------------------------------------------------------------------------------------------------------------------------------------------------------------|---|-----|--|---|---|---|---|
| 11 | <b>Muramoto et al.</b>     | 2015 | Intervention development for integration of conventional tobacco cessation interventions into routine CAM practice                | United States                                                                                                                                                | Describe the iterative community based participatory research (CBPR) process used to develop the CAMR intervention protocol and the resulting intervention that included both a patient/client centred tobacco cessation BI training and a practice system intervention tailored for CAM practitioners.                                                                                                                                                                                                                                                                                | Mixed method study    | Chiropractor, Acupuncturist, Massage Therapist | Interview 11 (3 chiropractors, 3 acupuncturists, 5 massage therapists) Survey: 356. Differences in response rate by discipline: chiropractors, 30% (n = 56); acupuncturists 50% (n = 63); massage therapists, 19% (n = 237). | Interviews and survey                                   | National Cancer Institute                                                                                                                                                                                 | None                                                                                                                                                                                                 | 3 | Yes |  | X | X |   | X |
| 12 | <b>Newman et al.</b>       | 1989 | Nutrition-related backgrounds and counseling practices of doctors of chiropractic                                                 | United States                                                                                                                                                | Examine the nutrition counseling practices of San Francisco Bay Area Chiropractic Society members and determine whether there are any relationships among their counseling practices, nutrition education backgrounds, and sources of nutrition information.                                                                                                                                                                                                                                                                                                                           | Cross sectional study | Chiropractor                                   | 100 or 99, unclear                                                                                                                                                                                                           | Survey                                                  | Not stated                                                                                                                                                                                                | Not stated                                                                                                                                                                                           | 4 | N/A |  |   | X |   |   |
| 13 | <b>Pinto et al.</b>        | 2022 | Lifestyle and health behaviour change support in traditional acupuncture: a mixed method survey study of reported practice (UK)   | United Kingdom                                                                                                                                               | Establish the prevalence of UK traditional Acupuncturists support for lifestyle and health behaviour change (LHBC) and the patterns of support across different behaviours (particularly diet, physical activity, alcohol consumption, smoking and sleep hygiene) and across different patients (those presenting with acute/chronic conditions). Test which Theory of Planned Behaviour (TPB) variables and other practitioner characteristics predict acupuncturists engagement in LHBC support. What factors might guide clinical decisions about when to first offer LHBC support. | Mixed method study    | Acupuncturist                                  | 352                                                                                                                                                                                                                          | Survey with both quantitative and qualitative questions | British Acupuncture Council and University of South Hampton VC scholarship                                                                                                                                | JWP is a member of the BAoC and has received a BAoC Research Award towards this research. FLB has received speaker's honoraria from the BAoC. DN & KB declare that they have no competing interests. | 5 | Yes |  | X | X | X | X |
| 14 | <b>Rupert</b>              | 2000 | A survey of practice patterns and the health promotion and prevention attitudes of US chiropractors. Maintenance care: Part I     | United States                                                                                                                                                | Explore primary care prevention and health promotion attitudes and practice patterns of chiropractors, in particular the concept of maintenance care.                                                                                                                                                                                                                                                                                                                                                                                                                                  | Cross sectional study | Chiropractor                                   | 658                                                                                                                                                                                                                          | Survey                                                  | National Chiropractic Mutual Insurance Company and Cleveland Chiropractic College, Kansas City, Mo, and administered by the Foundation for Chiropractic Education and Research                            | Interests not stated                                                                                                                                                                                 | 5 | N/A |  | X | X |   |   |
| 15 | <b>Sawyer &amp; Boline</b> | 1990 | Chiropractic attitudes about exercise and other health behaviors                                                                  | United States                                                                                                                                                | Examine health promotion attitudes of Chiropractic Doctors, specifically their views regarding the importance of exercise and other key health behaviours.                                                                                                                                                                                                                                                                                                                                                                                                                             | Cross sectional study | Chiropractor                                   | 371                                                                                                                                                                                                                          | Survey                                                  | Not stated                                                                                                                                                                                                | Not stated                                                                                                                                                                                           | 4 | N/A |  | X | X |   | X |
| 16 | <b>Sherman et al.</b>      | 2005 | The practice of acupuncture: Who are the providers and what do they do?                                                           | United States                                                                                                                                                | Provide basic information about the training and practices of licensed Acupuncturists.                                                                                                                                                                                                                                                                                                                                                                                                                                                                                                 | Cross sectional study | Acupuncturist                                  | 217                                                                                                                                                                                                                          | Survey                                                  | Grants from the Group Health Foundation, the Agency for Healthcare Policy and Research, the National Institutes of Health. In-kind support was provided by the Centers for Disease Control and Prevention | None                                                                                                                                                                                                 | 4 | N/A |  |   | X |   |   |
| 17 | <b>Steel et al. (a)</b>    | 2020 | Overview of international naturopathic practice and patient characteristics: results from a cross-sectional study in 14 countries | Other: Portugal, United Kingdom, Switzerland, Spain, Canada, United States, Chile, Brazil, Hong Kong, India, Nepal, Australia, New Zealand and South Africa. | Describe the characteristics of typical Naturopathic practices and their associated patients internationally.                                                                                                                                                                                                                                                                                                                                                                                                                                                                          | Cross sectional study | Naturopath                                     | 56                                                                                                                                                                                                                           | Survey                                                  | World Naturopathic Federation (WNF)                                                                                                                                                                       | None                                                                                                                                                                                                 | 4 | N/A |  |   | X |   |   |

|    |                  |      |                                                                                                                                                                      |                                                                                                                                                                                                                |                                                                                                                                                                                                                                                                                                                    |                       |                                                                                                                                                                                                                                                                        |     |                                       |                                                                                                                                                                                                                                |                                                                                                                                                                                         |     |     |  |   |   |   |   |  |
|----|------------------|------|----------------------------------------------------------------------------------------------------------------------------------------------------------------------|----------------------------------------------------------------------------------------------------------------------------------------------------------------------------------------------------------------|--------------------------------------------------------------------------------------------------------------------------------------------------------------------------------------------------------------------------------------------------------------------------------------------------------------------|-----------------------|------------------------------------------------------------------------------------------------------------------------------------------------------------------------------------------------------------------------------------------------------------------------|-----|---------------------------------------|--------------------------------------------------------------------------------------------------------------------------------------------------------------------------------------------------------------------------------|-----------------------------------------------------------------------------------------------------------------------------------------------------------------------------------------|-----|-----|--|---|---|---|---|--|
| 18 | Steel et al. (b) | 2020 | Integrative physiology and traditional naturopathic practice: Results of an international observational study                                                        | Other: European (Portugal, United Kingdom, Switzerland, Spain), Americas (Canada, United States, Chile, Brazil), Western Pacific (Hong Kong, Australia, New Zealand) and African (South Africa) world regions. | Characterise Naturopathic practice as it relates to the identification of multiple physiological systems in the diagnosis and treatment of patients.                                                                                                                                                               | Cross sectional study | Naturopath                                                                                                                                                                                                                                                             | 56  | Survey                                | World Naturopathic Federation (WNF). Representatives of the WNF were involved in preliminary stages of study design and analysis.                                                                                              | AS is an editorial board member of this journal but editorial board member status had no bearing on editorial consideration. The authors have no other conflict of interest to declare. | 4   | N/A |  | X | X |   |   |  |
| 19 | Steel & Lloyd    | 2021 | Community education and health promotion activities of naturopathic practitioners: results of an international cross-sectional survey                                | Other: World regions North America, Latin American, South East Asian, European, Western Pacific, Other (African, Eastern Mediterranean, not specified).                                                        | Examine health promotion behaviours of Naturopathic Practitioners internationally.                                                                                                                                                                                                                                 | Cross sectional study | Naturopath                                                                                                                                                                                                                                                             | 813 | Survey                                | No funding was provided to support this research. The World Naturopathic Federation provided funds for the open access publication and had input in the design of the study and interpretation of the results of the analysis. | None                                                                                                                                                                                    | 4   | N/A |  | X | X | X |   |  |
| 20 | Steel et al. (c) | 2020 | The naturopathic profession in Australia: A secondary analysis of the Practitioner Research and Collaboration Initiative (PRACI)                                     | Australia                                                                                                                                                                                                      | Describe the characteristics of Naturopaths and Naturopathy practice in Australia.                                                                                                                                                                                                                                 | Cross sectional study | Naturopath                                                                                                                                                                                                                                                             | 281 | Survey                                | Endeavour College of Natural Health                                                                                                                                                                                            | None                                                                                                                                                                                    | 4   | N/A |  | X | X |   |   |  |
| 21 | Steel et al.     | 2017 | An overview of the Practitioner Research and Collaboration Initiative (PRACI): a practice-based research network for complementary medicine                          | Australia                                                                                                                                                                                                      | Update on the progress of the Practitioner Research Collaboration Initiative (PRACI) project and describes the characteristics of PRACI members in order to inform and facilitate further sub-studies through the PRACI Practice based Research Network (PBRN).                                                    | Cross sectional study | Multi-modality; Massage therapy, Naturopathy, Noncomplementary medicine health qualification, Nutrition, Reflexology, Acupuncture, Western herbal medicine, Myotherapy, Aromatherapy, Homeopathy, Chinese Herbal Medicine, Bowen therapy, Kinesiology, Yoga, Ayurveda. | 764 | Survey                                | Endeavour College of Natural Health                                                                                                                                                                                            | None                                                                                                                                                                                    | 4   | N/A |  | X |   |   |   |  |
| 22 | Tripodi et al.   | 2021 | Osteopaths' perspectives on patient adherence to self-management strategies: A qualitative content analysis                                                          | Australia                                                                                                                                                                                                      | Assess osteopaths perceptions of patient adherence to self-management strategies and evaluate the practitioner perceived patient barriers and enablers in osteopathic practice.                                                                                                                                    | Interviews            | Osteopath                                                                                                                                                                                                                                                              | 14  | One-on-one semi structured interviews | None                                                                                                                                                                                                                           | None                                                                                                                                                                                    | N/A | Yes |  |   |   | X | X |  |
| 23 | Walker et al.    | 2000 | Provision of nutrition counseling, referrals to registered dietitians, and sources of nutrition information among practicing chiropractors in the United States      | United States                                                                                                                                                                                                  | Examine Chiropractors' provision of nutrition counseling, referrals to registered dietitians, and sources of nutrition information. Determine Chiropractors' knowledge of the minimum educational requirement for registered dietitians and evaluation of the nutrition training received in chiropractic schools. | Cross sectional study | Chiropractor                                                                                                                                                                                                                                                           | 375 | Survey                                | Not stated                                                                                                                                                                                                                     | Not stated                                                                                                                                                                              | 5   | N/A |  | X | X |   | X |  |
| 24 | Ziegler et al.   | 2023 | Discrepant perceptions of biopsychosocial and active care recommendations between doctors of chiropractic and midlife and older adult patients: A descriptive survey | United States                                                                                                                                                                                                  | To assess perceptions about the inclusion of biopsychosocial and active care recommendations during chiropractic clinical encounters between Chiropractic Doctors and their midlife and older adult patients and identify if there were any discrepancies between their recollections                              | Cross sectional study | Chiropractor                                                                                                                                                                                                                                                           | 29  | Survey                                | NCIMC Foundation                                                                                                                                                                                                               | None                                                                                                                                                                                    | 3   | N/A |  | X | X |   |   |  |
