# Supplementary material
Source: Research Square preprint supplement (doi:10.21203/rs.3.rs-10186022/v1)
Supplement: Supplementary file 2 [file 69521ed509ff89ba005ed519.docx]

### Supplementary Figure 1 – Sample of Search String for EMBASE

This figure provides an example of the search strategy applied in Embase for this review.

**
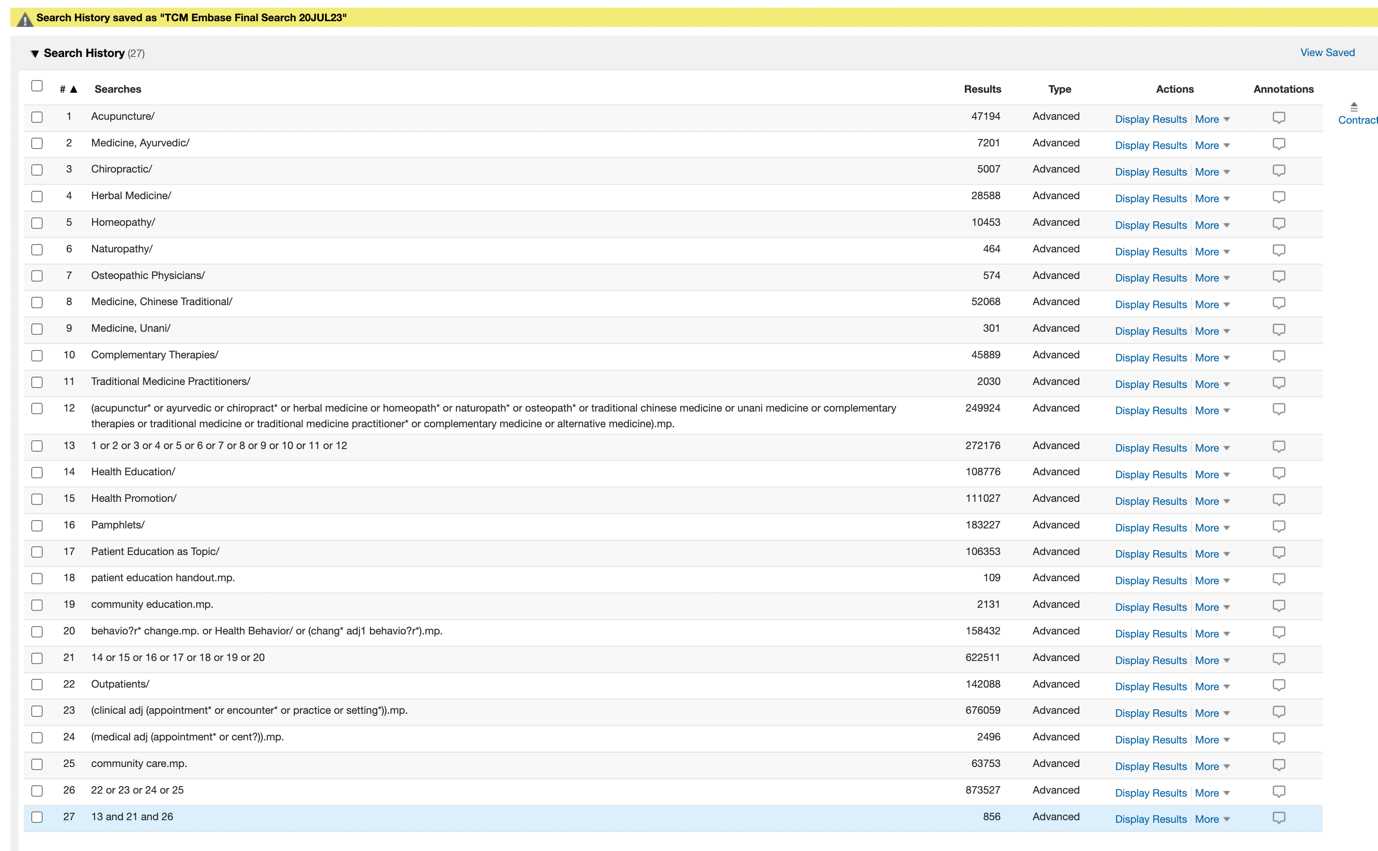
**
