# Supplementary material
Source: Research Square preprint supplement (doi:10.21203/rs.3.rs-10186022/v1)
Supplement: Supplementary file 3 [file 807f60fbb0cfcedfb4508ec4.pdf]

## Supplementary Table 2 – Search String

Overview of search strings used across databases.

| String 1                                                                                                                                                                                                                                                                                                                                                                                                                                            | AND | String 2                                                                                                                                                                       | AND | String 3                                                                                                                                                                                          |
|-----------------------------------------------------------------------------------------------------------------------------------------------------------------------------------------------------------------------------------------------------------------------------------------------------------------------------------------------------------------------------------------------------------------------------------------------------|-----|--------------------------------------------------------------------------------------------------------------------------------------------------------------------------------|-----|---------------------------------------------------------------------------------------------------------------------------------------------------------------------------------------------------|
| “Acupuncture” or<br>“Acupuncturist” or<br>“Ayurvedic Medicine” or<br>“Ayurvedic” or<br>“Chiropractic” or<br>“Chiropractor” or<br>“Herbal Medicine” or<br>“Homeopath” or<br>“Homeopathy” or<br>“Naturopathy” or<br>“Naturopath” or<br>“Osteopath” or<br>“Traditional Chinese Medicine” or<br>“Unani Medicine” or<br>“Alternative Medicine” or<br>“Complementary Medicine” or<br>“Complementary Therapies” or<br>“Traditional Medicine Practitioners” |     | “Behaviour Change” or<br>“Community Education” or<br>“Health Education” or<br>“Health Promotion” or<br>“Pamphlets” or<br>“Patient Education” or<br>“Patient Education Handout” |     | “Clinical Appointment” or<br>“Clinical Encounter” or<br>“Clinical Practice” or<br>“Clinical Setting” or<br>“Community Care” or<br>“Medical Appointment” or<br>“Medical Centre” or<br>“Outpatient” |
