# Supplementary material
Source: Research Square preprint supplement (doi:10.21203/rs.3.rs-10186022/v1)
Supplement: Supplementary file 4 [file d8c23680063b5e0131392725.pdf]

## Supplementary Table 1 - Inclusion and Exclusion Criteria and Study Parameters

Summary of inclusion and exclusion criteria for review methodology.

| Criteria Type    | Population                                                                                                                                                                                                                                                                                               | Intervention/Exposure                                                                                                                             | Outcomes/Setting                                                                                                                                                   | Details                                                                                                                                                                                                                                                                                                                                                                                                                                                                                                                                                                                                                                                |
|------------------|----------------------------------------------------------------------------------------------------------------------------------------------------------------------------------------------------------------------------------------------------------------------------------------------------------|---------------------------------------------------------------------------------------------------------------------------------------------------|--------------------------------------------------------------------------------------------------------------------------------------------------------------------|--------------------------------------------------------------------------------------------------------------------------------------------------------------------------------------------------------------------------------------------------------------------------------------------------------------------------------------------------------------------------------------------------------------------------------------------------------------------------------------------------------------------------------------------------------------------------------------------------------------------------------------------------------|
| <b>Inclusion</b> | Acupuncturist<br>Alternative<br>Medicine<br>Ayurvedic<br>Medicine<br>Chiropractor<br>Complementary<br>Medicine<br>Complementary<br>Therapies<br>Herbal Medicine<br>Homeopath<br>Naturopath<br>Osteopath<br>Traditional<br>Chinese Medicine<br>Traditional<br>Medicine<br>Practitioners<br>Unani Medicine | Behaviour Change<br>Community Education<br>Health Education<br>Health Promotion<br>Pamphlets<br>Patient Education<br>Patient Education<br>Handout | Clinical<br>Appointment<br>Clinical Encounter<br>Clinical Practice<br>Clinical Setting<br>Community Care<br>Medical<br>Appointment<br>Medical Centre<br>Outpatient | <ul style="list-style-type: none"> <li>- Original research (qualitative or quantitative)</li> <li>- Focused on TCIM practitioner perspectives</li> <li>- One-on-one care in clinical or community settings</li> <li>- Patients visiting specifically for healthcare needs</li> <li>- WHO-recognised TCIM professions including:               <ul style="list-style-type: none"> <li>- Ayurvedic medicine, acupuncture, chiropractic, herbal medicine, homeopathy, naturopathy, osteopathy, traditional Chinese medicine, Unani medicine</li> </ul> </li> <li>- Conducted in countries with UHC legislation</li> <li>- Published in English</li> </ul> |
| <b>Exclusion</b> | —                                                                                                                                                                                                                                                                                                        | —                                                                                                                                                 | —                                                                                                                                                                  | <ul style="list-style-type: none"> <li>- Conducted in hospital settings</li> <li>- Study designs with deliberate health promotion interventions (e.g., clinical trials, program evaluations, community-based programs)</li> <li>- Health professionals in public health policy roles</li> </ul>                                                                                                                                                                                                                                                                                                                                                        |

(Note, a comparator was not required due to the topic of the review)
